# Supplementary material
Source: Springer Nature journal article supplement (https://www.springermedizin.de/resource/supplementary/12874_2008_320_MOESM4_ESM.pdf/9434310)
Supplement: MOESM4 [file 9434310]

True  
Disease  
Status

|          |  | +   | -    |        |
|----------|--|-----|------|--------|
| Test 1 + |  | 34  | 1783 | 1,817  |
| Test 1 - |  | 66  | 8117 | 8,183  |
|          |  | 100 | 9900 | 10,000 |

True  
Disease  
Status

|          |  | +   | -    |        |
|----------|--|-----|------|--------|
| Test 2 + |  | 43  | 1783 | 1,826  |
| Test 2 - |  | 57  | 8117 | 8,174  |
|          |  | 100 | 9900 | 10,000 |

Observed  
Disease  
Status

|          |  | +  | -    |        |
|----------|--|----|------|--------|
| Test 1 + |  | 34 | 1793 | 1,827  |
| Test 1 - |  | 11 | 8162 | 8,173  |
|          |  | 45 | 9955 | 10,000 |

Observed  
Disease  
Status

|          |  | +  | -    |        |
|----------|--|----|------|--------|
| Test 2 + |  | 23 | 1793 | 1,816  |
| Test 2 - |  | 22 | 8162 | 8,184  |
|          |  | 45 | 9955 | 10,000 |
